# Supplementary material
Source: MDPI journal article supplement (https://www.mdpi.com/2071-1050/14/21/14515)
Supplement: s1 [file s1]

## Supporting information

# Investigation of Radon in Groundwater and the Corresponding Human-Health Risk Assessment in Northeastern Saudi Arabia

Al Mamun<sup>1</sup> and Amira Salman Alazmi<sup>2</sup>

<sup>1</sup>Department of Physics, College of Science, University of Hafr Al Batin, Al Jamiah, Hafr Al Batin 39524, Saudi Arabia.

<sup>2</sup>Department of Chemistry, College of Science, University of Hafr Al Batin, Al Jamiah, Hafr Al Batin 39524, Saudi Arabia.

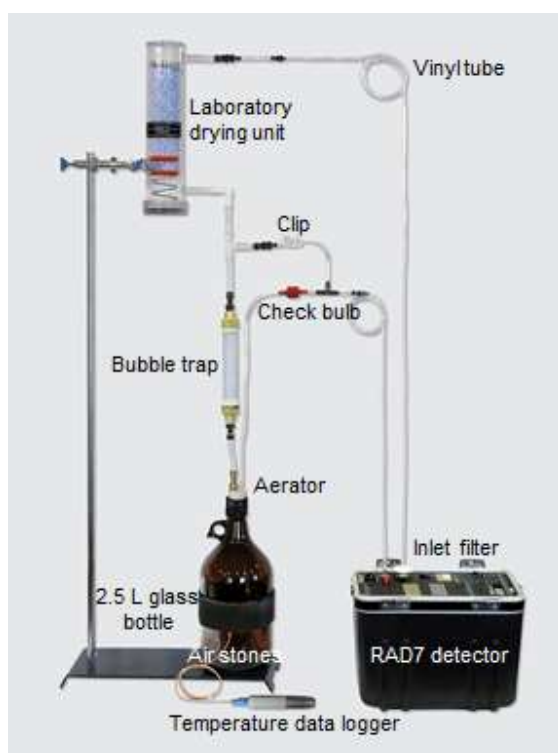

**Figure S1.** Schematic diagram of a RAD7 detector meter with big bottle system.

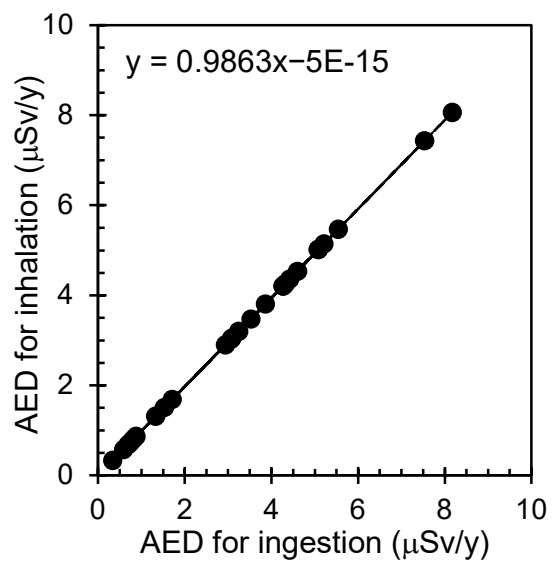

**Figure S2.** The ratio between the annual effective dose for ingestion and inhalation for adults.
